# Supplementary material for: Luteolin attenuates doxorubicin-induced cardiotoxicity by modulating the PHLPP1/AKT/Bcl-2 signalling pathway
Source: PeerJ. 2020 May 11;8:e8845. doi: 10.7717/peerj.8845 (PMC7224230; doi:10.7717/peerj.8845)
Supplement: Supplemental Information 2 [file peerj-08-8845-s002.xls]

## Sheet: body weight
body weight		Control	DOX group	LUT (50 mg/kg) group	LUT (100 mg/kg) group		Control	DOX group	LUT (50 mg/kg) group	LUT (100 mg/kg) group
	0w	202	207	203	209	1w	214	194	193	196
		209	210	207	211		218	199	200	198
		210	206	209	206		215	198	196	199
		213	203	205	212		211	197	201	199
		220	205	207	209		216	192	194	201
		223	209	204	203		213	190	195	195
		210	201	206	205		215	197	197	193
		208	203	210	207		217	196	199	201
	3w	244	181	208	205	5w	252	172	222	225
		246	184	210	213		260	173	228	230
		258	173	212	215		262	165	221	235
		247	180	208	216		255	168	226	231
		238	174	211	215		263	173	227	234
		252	173	205	211		251	173	225	236
		246	168	203	209		252	172	230	227
		253	180	211	209		253	174	217	225

## Sheet: heart weight
At six week
heart weight	Control	DOX group	LUT (50 mg/kg) group	LUT (100 mg/kg) group
	0.85	1.18	0.99	0.85
	0.71	1.17	0.99	0.87
	0.87	1.13	0.98	0.9
	0.88	1.04	0.92	0.92
	0.77	0.98	0.96	0.86
	0.89	1.02	0.98	0.96
	0.82	0.95	1.12	0.99
	0.84	1.13	1.02	1.03
	1	1.48934e-05	6.90413e-05	0.0103726
		1	0.0508837	0.00155378

## Sheet: Sheet3
	252	260	262	255	263	251	252	253
	172	173	165	168	173	173	172	174
	222	228	221	226	227	225	230	217
	225	230	235	231	234	236	227	225
