# Supplementary material for: Luteolin attenuates doxorubicin-induced cardiotoxicity by modulating the PHLPP1/AKT/Bcl-2 signalling pathway
Source: PeerJ. 2020 May 11;8:e8845. doi: 10.7717/peerj.8845 (PMC7224230; doi:10.7717/peerj.8845)
Supplement: Supplemental Information 3 [file peerj-08-8845-s003.xls]

## Sheet: BNP
BNP	Control	DOX group	LUT (50 mg/kg) group	LUT (100 mg/kg) group
	16.1722	27.6222	20.1667	18.5556
	16.1611	28.3944	21.9444	18.6111
	16.1056	28.15	21.6667	19.0889
	16.1667	24	25	16.3444
	16.1444	28.4222	25	19.4444
	16.85	28	22.7778	19.333

## Sheet: LDH
LDH	Control	DOX group	LUT (50 mg/kg) group	LUT (100 mg/kg) group
	1835.92	3452.18	2715.94	2570.67
	1760.15	3473.43	2871.41	2388.2
	1810.31	3706.16	2978.96	2377.9
	1657.81	3014.77	2968.01	2310.73

## Sheet: cTNT
cTNT	Control	DOX group	LUT (50 mg/kg) group	LUT (100 mg/kg) group
	326.441	578.538	494.186	400.165
	334.309	598.933	497.944	434.478
	339.799	581.99	491.797	452.937
	432.386	580.343	504.185	436.418
	332.386	560.873	469.358	471.364
	444	556.333	533.372	435.525

## Sheet: CKMB
CKMB	Control	DOX group	LUT (50 mg/kg) group	LUT (100 mg/kg) group
	8.14583	17.8819	15.4201	13.0312
	10.7951	17.3438	13.9514	12.6042
	11.684	17.8819	14.1354	12.2569
	8.46528	16.7014	12.4826	10.2951

## Sheet: MDA
MDA	Control	DOX group	LUT (50 mg/kg) group	LUT (100 mg/kg) group
	6.90322	34.1936	23.0538	13.1505
	7.17204	26.172	17.3011	18.8495
	10.4624	39.6237	25.2796	15.5807
	10.6129	28.6344	23.6237	12.1075

## Sheet: SOD
SOD	Control	DOX group	LUT (50 mg/kg) group	LUT (100 mg/kg) group
	143.072	73.8551	105.232	136.449
	149.884	88.4928	92.5652	122.102
	154.812	79.8841	107.754	126.681
