# Supplementary material for: Luteolin attenuates doxorubicin-induced cardiotoxicity by modulating the PHLPP1/AKT/Bcl-2 signalling pathway
Source: PeerJ. 2020 May 11;8:e8845. doi: 10.7717/peerj.8845 (PMC7224230; doi:10.7717/peerj.8845)
Supplement: Supplemental Information 14 [file peerj-08-8845-s014.xlsx]

## Sheet: wb of bcl2 and bax
	Bcl-2	Control	DOX group	LUT (50 mg/kg) group	LUT (100 mg/kg) group
		15897.5	22519.4	37443.3	35210.7
		15652.6	22086.9	36690.5	36965.1
		15677.5	22750.8	38110.8	33847.1
	Bax	Control	DOX group	LUT (50 mg/kg) group	LUT (100 mg/kg) group
		16405.8	33522.6	30982.3	18427.3
		15409.7	32363.7	31937.8	18189
		17574.6	33735.1	30905	18879.1
